# Supplementary material for: Effects of exposure of adult mice to multi-walled carbon nanotubes on the liver lipid metabolism of their offspring
Source: Royal Society of Chemistry journal article supplement (doi:10.1039/c8tx00032h), 2018-01-01
Supplement: c8tx00032h1.pdf [file c8tx00032h1.pdf]

Supplemental Table 1. PCR primer sequences

| Gene            | Forwards:                   | Reverse:                      |
|-----------------|-----------------------------|-------------------------------|
| IL-1 $\beta$    | CTGTGACTCGTGGGATGATG        | GGGATTTTGTCGTTGCTTGT          |
| IL-6            | AGCCAGAGTCATTCAGAGCAAT      | CCGAGTAGACCTCATAGTGACCTT<br>T |
| CD11c           | TTAAAAACCTGGATCGGAACCA<br>A | GCATTAGCTTCAGATTTACGGGT       |
| ARG1            | GGCAGAGGTCCAGAAGAATG        | TGTTGATGTCAGTGTGAGCAT         |
| CD206           | ATTGTGGAGCAGATGGAAGGT       | TTGTCGTAGTCAGTGGTGGTT         |
| CD86            | TGTTTCCGTGGAGACGCAAG        | TTGAGCCTTTGTAAATGGGCA         |
| Srebp-1         | TGACCCGGCTATTCCGTGA         | CTGGGCTGAGCAATACAGTTC         |
| Acaca- $\alpha$ | CAGGACGTGAAGCTAAAGCCT       | CTCCGAAGTTATCCCATAGGAA        |
| Ppar- $\alpha$  | TACTGCCGTTTTCAACAAGTGC      | AGGTCGTGTTACAGGTAAGA          |
| Lpl             | TTGCCCTAAGGACCCCTGAA        | TTGAAGTGGCAGTTAGACACAG        |
| Insig-2         | TTGGGCTGGTTGTACCCCTG        | TGGCGTGATTTATACCCACGA         |
| Gapdh           | TCTCTGCTCCTCCCTGTTCT        | GATGGTGATGGGTTTCCCGT          |
